# Supplementary material for: Factors Associated with Low Vitamin D Status among Older Adults in Kuwait
Source: MDPI journal article supplement (doi:10.3390/nu14163342), 2022-08-15
Supplement: s1 [file s1]

## Supplementary file

**Table S1.** Socio-demographic characteristics, clinical characteristics and lab data of participants who received/did not receive vitamin D supplementation.

|                                         | [ALL]<br>N=237   | No supplement<br>N=137 | Supplement<br>N=100 | OR               | P            |
|-----------------------------------------|------------------|------------------------|---------------------|------------------|--------------|
| <b>Gender:</b>                          |                  |                        |                     |                  |              |
| Female                                  | 128 (54.0%)      | 63 (46.0%)             | 65 (65.0%)          | Ref.             | Ref.         |
| Male                                    | 109 (46.0%)      | 74 (54.0%)             | 35 (35.0%)          | 0.46 [0.27;0.78] | 0.004        |
| <b>Age</b>                              | 70.0 [67.6;74.3] | 70.0 [67.4;74.3]       | 70.2 [67.9;74.3]    | 0.99 [0.94;1.05] | 0.835        |
| <b>Dietary intake of vitamin D (IU)</b> | 189 [113;274]    | 177 [93.7;245]         | 210 [146;301]       | 1.00 [1.00;1.00] | 0.228        |
| <b>Dietary intake of Calcium(mg)</b>    | 718 [519;1047]   | 639 [466;950]          | 805 [610;1117]      | 1.00 [1.00;1.00] | <b>0.044</b> |
| <b>Calcium supplement (yes/no)</b>      |                  |                        |                     |                  |              |
| No                                      | 230 (97.0%)      | 135 (98.5%)            | 95 (95.0%)          | Ref.             | Ref.         |
| Yes                                     | 7 (2.95%)        | 2 (1.46%)              | 5 (5.00%)           | 3.39 [0.68;26.8] | 0.139        |
| <b>Daily calorie intake (Kcal)</b>      | 1357 [1040;1727] | 1264 [982;1614]        | 1514 [1097;1880]    | 1.00 [1.00;1.00] | <b>0.004</b> |
| <b>Pigmentary Phototype:</b>            |                  |                        |                     |                  |              |
| II/III                                  | 154 (65.0%)      | 92 (67.2%)             | 62 (62.0%)          | 1.86 [1.02;3.42] | <b>0.042</b> |
| IV                                      | 61 (25.7%)       | 27 (19.7%)             | 34 (34.0%)          | Ref.             | Ref.         |
| V                                       | 22 (9.28%)       | 18 (13.1%)             | 4 (4.00%)           | 0.34 [0.09;0.98] | <b>0.045</b> |
| <b>Seasonality</b>                      |                  |                        |                     |                  |              |
| Summer/Fall                             | 82 (34.6%)       | 42 (30.7%)             | 40 (40.0%)          | Ref.             | Ref.         |
| Winter/Spring                           | 155 (65.4%)      | 95 (69.3%)             | 60 (60.0%)          | 0.66 [0.39;1.14] | 0.140        |
| <b>Smoke cigarettes</b>                 |                  |                        |                     |                  |              |
| No                                      | 220 (92.8%)      | 128 (93.4%)            | 92 (92.0%)          | Ref.             | Ref.         |
| Yes                                     | 17 (7.17%)       | 9 (6.57%)              | 8 (8.00%)           | 1.24 [0.44;3.41] | 0.678        |
| <b>Comorbidity indicators</b>           |                  |                        |                     |                  |              |
| <b>Dyslipidemia</b>                     |                  |                        |                     |                  |              |
| No                                      | 67 (28.3%)       | 38 (27.7%)             | 29 (29.0%)          | Ref.             | Ref.         |
| Yes                                     | 170 (71.7%)      | 99 (72.3%)             | 71 (71.0%)          | 0.94 [0.53;1.68] | 0.831        |
| <b>Hypertension</b>                     |                  |                        |                     |                  |              |
| No                                      | 72 (30.4%)       | 42 (30.7%)             | 30 (30.0%)          | Ref.             | Ref.         |
| Yes                                     | 165 (69.6%)      | 95 (69.3%)             | 70 (70.0%)          | 1.03 [0.59;1.82] | 0.917        |
| <b>Cardiovascular disease</b>           |                  |                        |                     |                  |              |
| No                                      | 182 (77.1%)      | 104 (76.5%)            | 78 (78.0%)          | Ref.             | Ref.         |
| Yes                                     | 54 (22.9%)       | 32 (23.5%)             | 22 (22.0%)          | 0.92 [0.49;1.70] | 0.788        |
| <b>Type 2 Diabetes</b>                  |                  |                        |                     |                  |              |
| No                                      | 85 (35.9%)       | 55 (40.1%)             | 30 (30.0%)          | Ref.             | Ref.         |
| Yes                                     | 152 (64.1%)      | 82 (59.9%)             | 70 (70.0%)          | 1.56 [0.90;2.72] | 0.110        |
| <b>Osteoporosis:</b>                    |                  |                        |                     |                  |              |
| No                                      | 178 (75.1%)      | 107 (78.1%)            | 71 (71.0%)          | Ref.             | Ref.         |
| Yes                                     | 59 (24.9%)       | 30 (21.9%)             | 29 (29.0%)          | 1.45 [0.80;2.64] | 0.218        |
| <b>Weight (Kg)</b>                      | 77.0 [68.0;86.0] | 78.0 [70.0;86.0]       | 76.0 [66.0;86.0]    | 0.99 [0.98;1.01] | 0.456        |
| <b>Height (cm)</b>                      | 161 [155;170]    | 165 [156;172]          | 158 [154;166]       | 0.98 [0.96;1.00] | 0.104        |
| <b>Waist-to-Hip Ratio</b>               | 0.94 [0.89;0.98] | 0.94 [0.89;0.98]       | 0.94 [0.88;0.99]    | 2.23 [0.22;23.1] | 0.500        |
| <b>Waist Hip WHO:</b>                   |                  |                        |                     |                  |              |
| Low                                     | 67 (28.5%)       | 46 (34.1%)             | 21 (21.0%)          | Ref.             | Ref.         |
| Moderate                                | 40 (17.0%)       | 20 (14.8%)             | 20 (20.0%)          | 2.17 [0.97;4.94] | 0.061        |
| High                                    | 128 (54.5%)      | 69 (51.1%)             | 59 (59.0%)          | 1.86 [1.01;3.53] | 0.048        |
| <b>BMI catogry</b>                      |                  |                        |                     |                  |              |
| Normal weight                           | 30 (12.9%)       | 15 (11.2%)             | 15 (15.2%)          | Ref.             | Ref.         |
| Obese                                   | 96 (41.2%)       | 53 (39.6%)             | 43 (43.4%)          | 0.81 [0.35;1.87] | 0.624        |
| Overweight                              | 107 (45.9%)      | 66 (49.3%)             | 41 (41.4%)          | 0.62 [0.27;1.42] | 0.261        |
| <b>Sleep Duration_category</b>          |                  |                        |                     |                  |              |
| <6                                      | 40 (17.0%)       | 25 (18.5%)             | 15 (15.0%)          | Ref.             | Ref.         |

|                               |                  |                  |                  |                  |              |
|-------------------------------|------------------|------------------|------------------|------------------|--------------|
| 6-8                           | 190 (80.9%)      | 108 (80.0%)      | 82 (82.0%)       | 1.26 [0.63;2.60] | 0.519        |
| >8                            | 5 (2.13%)        | 2 (1.48%)        | 3 (3.00%)        | 2.40 [0.33;22.6] | 0.384        |
| <b>Sun Exposure</b>           | 0.00 [0.00;1.00] | 0.00 [0.00;1.00] | 0.00 [0.00;3.00] | 1.07 [0.98;1.17] | 0.127        |
| <b>Sun Exposure Category:</b> |                  |                  |                  |                  |              |
| <5 mins                       | 214 (91.1%)      | 128 (94.8%)      | 86 (86.0%)       | Ref.             | Ref.         |
| 5-30 mins                     | 21 (8.94%)       | 7 (5.19%)        | 14 (14.0%)       | 2.93 [1.16;8.13] | <b>0.023</b> |
| <b>Walking per minutes</b>    | 4.00 [0.00;7.00] | 4.00 [0.00;7.00] | 1.00 [0.00;6.00] | 0.94 [0.86;1.02] | 0.160        |
| <b>Laboratory test</b>        |                  |                  |                  |                  |              |
| <b>PTH mmol/L</b>             | 5.57 [4.06;7.27] | 6.13 [4.64;7.93] | 5.02 [3.69;6.51] | 0.83 [0.74;0.93] | <b>0.001</b> |
| <b>PO4 mmol/L</b>             | 1.12 [1.02;1.22] | 1.09 [1.02;1.19] | 1.15 [1.05;1.26] | 7.17 [1.41;36.6] | <b>0.018</b> |
| <b>Ca mmol/L</b>              | 2.29 [2.24;2.37] | 2.29 [2.22;2.36] | 2.32 [2.25;2.38] | 5.85 [0.70;48.7] | 0.102        |
| <b>ALP IU/L</b>               | 69.0 [57.0;85.0] | 68.0 [57.0;80.0] | 71.5 [59.8;91.2] | 1.01 [1.00;1.02] | <b>0.027</b> |

Analysis was performed using univariate logistic regression

Continuous normal and non-normal data were summarized using the mean  $\pm$  SD and median [IQR], respectively

Analysis was performed using Chi-square test of independence for categorical variables

Unpaired t-test and Mann-Whitney test were used to assess the association between vitamin D supplementation and continuous normal and non-normal variables, respectively

**Table S2.** Results of binomial logistic regression analysis for the factors associated with vitamin D deficiency.

| <b>Predictors</b>            | <b>Odds Ratios (OR)</b> | <b>CI</b>    | <b>p</b>     |
|------------------------------|-------------------------|--------------|--------------|
| (Intercept)                  | 1.22                    | 0.27 – 5.52  | 0.796        |
| PTH score                    | 1.16                    | 1.04 – 1.31  | <b>0.016</b> |
| <b>Daily calories (kcal)</b> | 0.9                     | 0.85 – 0.96  | <b>0.001</b> |
| <b>Gender</b>                |                         |              |              |
| Female                       | Reference               |              |              |
| Male                         | 2.13                    | 1.16 – 4.02  | <b>0.017</b> |
| <b>Pigmentary phototype</b>  |                         |              |              |
| IV                           | Reference               |              |              |
| II/III                       | 0.55                    | 0.28 – 1.07  | 0.077        |
| V                            | 4.46                    | 1.35 – 20.49 | <b>0.026</b> |
| <b>Seasonality</b>           |                         |              |              |
| Summer/Fall                  | Reference               |              |              |
| Winter/Spring                | 1.67                    | 0.91 – 3.08  | 0.099        |
| <b>Sun Exposure</b>          |                         |              |              |
| <5 mins                      | Reference               |              |              |
| 5-30 mins                    | 0.24                    | 0.08 – 0.70  | <b>0.011</b> |

**Table S3.** Results of binomial logistic regression analysis for the factors associated with vitamin D deficiency after including vitamin D and calcium intakes.

| <b>vit d def</b>             |                    |              |              |
|------------------------------|--------------------|--------------|--------------|
| <i>Predictors</i>            | <i>Odds Ratios</i> | <i>CI</i>    | <i>p</i>     |
| (Intercept)                  | 1.93               | 0.51 – 7.38  | 0.335        |
| <b>PTH score</b>             | 1.16               | 1.03 – 1.31  | <b>0.017</b> |
| <b>Daily calories (kcal)</b> | 0.90               | 0.81 – 0.99  | <b>0.039</b> |
| <b>Gender</b>                |                    |              |              |
| Female                       |                    |              |              |
| Male                         | 2.13               | 1.15 – 4.05  | <b>0.018</b> |
| <b>Pigmentary phototype</b>  |                    |              |              |
| IV                           |                    |              |              |
| II/III                       | 0.54               | 0.27 – 1.07  | 0.077        |
| V                            | 4.49               | 1.35 – 20.67 | <b>0.026</b> |
| <b>Seasonality</b>           |                    |              |              |
| Summer/Fall                  |                    |              |              |
| Winter/Spring                | 1.65               | 0.88 – 3.09  | 0.116        |
| <b>Sun exposure category</b> |                    |              |              |
| < 5 minutes                  |                    |              |              |
| 5 – 30 minutes               | 0.24               | 0.08 – 0.71  | <b>0.012</b> |
| Calcium intake (mg/day)      | 1.00               | 1.00 – 1.00  | 0.942        |
| Vitamin D intake (mg/day)    | 1.00               | 1.00 – 1.00  | 0.864        |
